**Patterns and predictors of *Staphylococcus aureus* carriage during** 1  
**the first year of life; a longitudinal study** 2

3 Aylana Reiss-Mandel<sup>1,2</sup>, Carmit Rubin<sup>1,3</sup>, Ayala Maayan-Mezger<sup>4</sup>, Ilya

4 Novikov<sup>3</sup>, Hanaa Jaber<sup>1</sup>, Mordechay Dolitzky<sup>5</sup>, Laurence Freedman<sup>3</sup>, Galia

5 Rahav<sup>2,6</sup>, Gili Regev-Yochay<sup>1,2,3\*</sup>

6 <sup>1</sup>Infection Prevention & Control Unit, Sheba Medical Center, Ramat Gan, Israel

7 <sup>2</sup>Sackler Faculty of Medicine, Tel Aviv University, Tel-Aviv, Israel <sup>3</sup>Gertner

8 Institute, Tel Hashomer, Israel <sup>4</sup>Department of Neonatology, Sheba Medical

9 Center, Ramat Gan, Israel <sup>5</sup>Maternity and Gynecology Center, Sheba Medical

10Center, Ramat Gan, Israel <sup>6</sup>Infectious Diseases Unit, Sheba Medical Center,

11Ramat Gan, Israel

12**Running Title: *S. aureus* carriage dynamics in the first year of life**

13**\*Corresponding Author**

14

15**Parts of the results of this manuscript were presented at the 3rd**

16**International Conference Pathophysiology of Staphylococci, Tubingen,**

17**Germany, Sept 2016 and at the 18<sup>th</sup> International Symposium on**

18**Staphylococci and Staphylococcal Infections (ISSSI), Copenhagen,**

19**Denmark, Aug 2018**

20

21

22

23

**24Abstract:**

25**Objectives:** To determine the patterns of *S. aureus* carriage in the first year of  
26life, its determinants and dynamics of transmission between mothers and  
27infants.

28**Methods:** Prospective longitudinal cohort study of *S. aureus* carriage among  
29mothers and their infants. Monthly screenings from pregnancy/birth through the  
30first year of the infant's life. Medical and lifestyle data was collected. Infant *S.*  
31*aureus* carriage was detected by rectal and nasal swabs and maternal carriage by  
32nasal swabs. Multivariate analysis and an NLMixed model were used to  
33determine predictors of carriage and *S. aureus* persistence.

34**Results:** 130 *S. aureus* carrier women and their 132 infants were included in the  
35study. 93% of the infants acquired *S. aureus* sometime during the first year of  
36life, 64% of them acquired the maternal strain, mostly (66%) during the first  
37month of life. 70 women (52.50%) and 17 infants (14%) carried *S. aureus*  
38persistently. Early acquisition of *S. aureus* carriage was associated with longer  
39duration of initial carriage and was the most significant predictor of *S. aureus*  
40persistence, while day-care center attendance was negatively associated with  
41persistent carriage.

42**Conclusions:** Early acquisition of *S. aureus*, mostly from the mother, is an  
43important determinant of carriage persistence in infancy.

44

45

46

47

48

49

50

## 51**Introduction:**

52 Asymptomatic carriage of *S. aureus* is common, with approximately 30% nasal  
53 carriage reported in the healthy population. Nasal *S. aureus* carriage has been  
54 shown to be an important source of transmission, as well as a significant source  
55 of endogenous infection (1, 2).

56 Risk factors of *S. aureus* carriage have been studied extensively in the adult  
57 population (3) and include age (3, 4), male gender (5-7), smoking (8), diabetes  
58 (9) and skin diseases, particularly atopic dermatitis (10). Longitudinal studies  
59 that reported carriage patterns, have found that 20% of adult healthy population  
60 are persistent carriers, typically of a single strain, 60% transient carriers and  
61 20% are never carriers (11-13). Much less is known about early infancy  
62 carriage patterns or predictors of carriage.

63 Here, in this longitudinal study, we follow a cohort of infants born to *S. aureus*  
64 carrier mothers monthly, from birth until the age of one year, and observe the  
65 carriage patterns and carried strains, and their determinants during the first year  
66 of life.

## 67**Methods:**

68 *Institutional Review Board (IRB) and patient consent.* IRB approval was given  
69 by the local committee of the Sheba Medical Center. Written informed consent  
70 was given by the women for her and her newborn's participation and a non-  
71 written approval of the other parent was also received.

72 *Study design, study period and study population.* In this prospective longitudinal  
73 cohort study, pregnant women, at least 34 weeks of gestation, who visited the  
74 monitoring unit during screening hours, were recruited and screened for nasal  
75 and vaginal *S. aureus* carriage. Only women who were detected as nasal or  
76 vaginal *S. aureus* carriers, were enrolled and followed. Recruitment took place  
77 for 3 hours a week between February 2009 and March 2018 at the Sheba  
78 Medical Center obstetrics monitoring unit. The Sheba Medical Center is the  
79 largest tertiary center in Israel, with approximately eleven thousand births per  
80 year. Approximately 400 women visit the obstetrics monitoring unit monthly  
81 for reasons including overdue pregnancies (40+ weeks), breech fetal  
82 positioning, low levels of amniotic fluid, babies with outlying measurements,  
83 and monitoring of any pregnant woman who came to the emergency room for  
84 any reason. Within 48 hours of delivery, the mothers were rescreened with  
85 vaginal and nasal swabs. Concurrently, newborns were screened with nasal and  
86 rectal swabs. Data addressing demographic details (age, number of siblings, pet  
87 ownership and smoking status), medical history, including obstetric history and  
88 pregnancy complications, co-morbidity, medication and antibiotic use, previous  
89 hospitalizations and breastfeeding status as well as pregnancy and delivery  
90 details were collected via a questionnaire and from the electronic medical files.  
91 Screening was performed by the attending midwife, obstetrician or pediatrician  
92 at the delivery room or at the nursery.

93 Monthly follow-up visits from the age of 1m and until 12m of age were carried  
94 out by a study coordinator at the infants' homes. During these visits mothers  
95 were screened with nasal swabs and children were screened with nasal and  
96 rectal swabs. Data addressing changing nutritional habits and medical events,

97including healthcare visits, antibiotic use, vaccination and hospitalizations were  
98also collected.

99*Laboratory methods.* Nasal screening was performed using a cotton-tipped swab  
100placed in Amies transport media (Copan innovation, Brescia, Italy). Swabs were  
101streaked on CHROMagar *S. aureus* plates (HiLabs, Rehovot, Israel) within 24  
102hours and incubated for 24-48h at 35°C. Catalase and Staphylase (PASTOREX®  
103STAPH-PLUS, BioRad, Marnes-la-Coquette, France) were performed on  
104suspected colonies to conclusively identify them as *S. aureus*. Cefoxitin agar  
105disk diffusion test was used to detect methicillin resistant *S. aureus* (MRSA)  
106according to the current clinical and laboratory standards institute (CLSI)  
107protocol.

108Genetic relatedness between mother and newborn strains were assessed by pulse  
109field gel electrophoresis (PFGE) and spa typing. Maternal strain acquisition by  
110the newborn was defined as acquisition of a *S. aureus* strain that was identical  
111(by PFGE or spa typing) to his/her mother's strain.

112PFGE was done following the European HARMONY protocol (14). Briefly,  
113digested DNA with *SmaI* was electrophoresed in 1% agarose gels for 21 hours  
114with a ramped pulse time of 5 to 40 seconds using a CHEF DRII system (Bio-  
115Rad Laboratories), using *S. aureus* NCTC 8325 as a reference. Genetic identity  
116between strains was defined according to Tenover (15).

117At least one strain from each pulsotype, and any strain where PFGE result was  
118not available were Spa typed. Spa typing was performed by purifying the PCR  
119product (Gene JET PCR DNA Purification kit, Fermentas) of the spa gene  
120encoding protein A, using the primers 1517R: GCT TTT GCA ATG TCA TTT

12ACT G and 1095F: AGA CGA TCC TTC GGT GAG C. PCR products were  
12Sanger sequenced by Hy Laboratories Ltd. (Rehovot, Israel), using BigDye  
12Terminator v1.1 Cycle Sequencing Kit (Applied Biosystems, Inc.) on the 3730xl  
12DNA Analyzer with DNA Sequencing Analysis Software v. 5.4. Sequences were  
12analyzed using the Fortinbras SpaTyper (<http://spatyper.fortinbras.us/>) and  
12Bidom Spa Server (16). Genetic relatedness of strains was evaluated based on  
12Spa repeat patterns using the Tree and Network Inference module of  
12Bionumerics Seven.

12Carriage patterns and definitions. Transient carrier mothers were defined as  
13Individuals who were colonized with *S. aureus* in less than 33% of available  
13Screenings. Persistent carrier mothers were defined as mothers who were  
13Colonized with *S. aureus* in at least 67% of the screenings available. Since most  
13Of the newborns acquired *S. aureus* within the first two months of life, using the  
13Above definitions would define many of the infants as persistent carriers,  
13Including those who only carried *S. aureus* for 2-3 months but were lost to  
13Follow up before the end of the year. We therefore used a more stringent  
13Definition for infant carriage: Persistent carriage of infants was defined as *S.*  
13*aureus* carriage detected in at least 67% of the screenings available and also in  
13At least 50% of the screenings from the second half year of life (age 6-12  
14Months). Either rectal or nasal carriage, were considered as child *S. aureus*  
14Carriage.

#### 14Statistical analysis:

14Descriptive data analysis was performed and Chi square test was used to  
14Examine the associations between categorical variables (i.e. mother's and child's

145arriage pattern). Spearman's rho was calculated to evaluate the correlation  
146between continuous variables (i.e. first month of *S. aureus* acquisition and  
147duration of infection).

148Initially, to explore which variable predicts persistent *S. aureus* carriage in the  
149child, a univariate analysis was done on the following variables: sex, gestational  
150age, birth weight, breastfeeding, pets, antibiotics in first year of life, skin  
151infections, attendance at day care center (DCC), maternal carriage persistence,  
152maternal carriage in first month of life, infant carriage in the first 2 months.  
153Variables that were found to be associated with persistent infant carriage  
154( $p < 0.2$ ) in the univariate analysis were included in the multiple logistic  
155regression model.

156To determine the predictors for *S. aureus* carriage each month during the  
157follow-up period, the altering demographic and clinical factors that  
158independently predict *S. aureus* carriage in the following month were assessed.  
159These factors included: infant's carriage status in the preceding month, maternal  
160carriage status in the preceding month, DCC attendance in the preceding month,  
161antibiotic use in the preceding month, breastfeeding in the preceding month, and  
162age. To account for the multiple measurements per subject in the longitudinal  
163design, a non-linear mixed model (NLMIXED procedure) which fits a logit  
164model was applied. Data were analyzed using SAS v9.4.

165

## 166**Results:**

### 167*Study population*

168 Of all women approached, approximately 30% agreed to participate and take  
169 part in the monthly visits for the full year of follow-up. They were screened and  
170 signed an informed consent. Of the 671 women who were recruited, 136 were  
171 carriers of *S. aureus* in the nose or vagina at recruitment and were enrolled and  
172 followed in our study. Of these, 130 women and their 132 newborns completed  
173 at least 6 months of follow-up and were included in the final analyses. A total of  
174 6043 swabs were collected from the mothers and children and 1887 *S. aureus*  
175 isolates were detected, 786 from the children and 1101 from the mothers.

176 Of the planned 12 monthly follow-up visits, 121 out of the 130 (93.1%) mother-  
177 child dyads completed at least 8 visits and 103 (79.2%) completed at least 10  
178 visits. The 130 mothers included in the final analyses had a mean age of 34.2  
179 years, (range 21 to 43, median 34) and a mean education level of 16.2 (+/-2.2)  
180 years. Thirty three women (25.3%) delivered their baby by Cesarean section  
181 (**Table 1**).

182 The children population was a normal birth cohort and children's characteristics  
183 are described in detail in **Table 1**. Approximately half of the children (74,  
184 56.1%) attended day care center (DCC) at some point during their first year of  
185 life, and of those, the median age of entry to DCC was 7 months (range 3-12  
186 months). Most of the children were breastfed (n=119; 90.2%). Of these, 75  
187 (63.0%) were breastfed for at least 6 months.

188 Health utilization during the first year of life was relatively high, with 72  
189 (54.6%) children consuming at least one antibiotic regimen, 32 (24.2%)  
190 consumed at least two regimens and 15 children (11.4%) consumed more than 3  
191 regimens during the follow up period. Nearly all of the children (n=125; 94.7%)



19had at least one episode of upper respiratory tract infection and 100 (75.8%)  
19children visited their primary care physician more than twice during the year for  
19non-routine vaccination visits. 12 (9.1%) children were hospitalized during the  
19year (**Table 1**).

196

### 197*Isolated Strains*

198Altogether, 119 clones were detected in 1887 bacterial isolates isolated from the  
19930 dyads over the course of the year. CC30 was the most frequently carried  
200clonal complex in our sample, based on identification and grouping of spa typed  
201strains. It was isolated 134 times; 9 different strains belonging to CC30 were  
202isolated from the noses of 23 dyads. t3243 (CC22) was the most frequently  
203isolated single strain, as it was carried by 10 dyads (**Table 2**). No clonal  
204complex was found to be carried more commonly by persistent carriers than by  
205transient or non-carriers.

206

### 207*Maternal S. aureus carriage patterns*

208At recruitment, 80 women carried *S. aureus* in the nose and 28 carried it in the  
209vagina. 22 women carried *S. aureus* in both the nose and the vagina, and 17 of  
210them carried the same strain in both sites. 57 women carried *S. aureus* in at  
211least one site at both recruitment and immediately surrounding labor. In 54  
212cases (91.2%), the same strain was carried during gestation and labor, regardless  
213of the carriage site.

214 Most of the participating women were defined as persistent carriers (n=70,  
215 53.9%), while nearly a quarter were transient carriers (n= 32, 24.6%) and for an  
216 additional 28 women it was difficult to determine the pattern of carriage since  
217 they were carriers approximately 50% of the time (**Table 3**). Of the 70  
218 persistent carrier women, 49 (70%) carried a single strain along all screenings  
219 during the year, as defined by PFGE or spa type, while 21 (30%) women carried  
220 a second strain at some point during the year. Nine of these women carried the  
221 secondary strain for only a month or two, after which the primary strain was  
222 again detected, while six women exchanged their initial strain with a second  
223 strain that was carried for most of the follow- up visits, and four women  
224 replaced their primary strain with a second strain that was carried for an  
225 extended period. (**Figure 1a**). No relationship was found between the length of  
226 carriage of a transient strain and its genetic relatedness to the persistent strain.  
227  
228 Of the women defined as transient carriers (n=32), 15 (46.9%) never carried *S.*  
229 *aureus* during the year, apart from the initial screening when recruited during  
230 pregnancy. Of the transient carrier women who carried *S. aureus* in more than  
231 one visit, 5/15 (33.3%) carried two different strains in the different visits  
232 (**Figure 1b**).

232

### 233 *Infant S. aureus acquisition and patterns*

234 Within the first year of life, 123 (93%) of the infants acquired *S. aureus*. Thirty  
235 (23%) newborns acquired *S. aureus* in at least one body site (nose, rectum, ear or  
236 umbilicus) within the first days of life, before discharge from the hospital.  
237 Twenty three of them (76.7%) carried it in the nose or rectum. Initially, infant

238 carriage was evenly distributed between nasal and rectal carriage. At 1 month,  
239 44.2% were nasal carriers, and 47.4% were both nasal and rectal carriers. With  
240 time, rectal carriage prevalence decreased and the nose became the predominant  
241 site. (**Figure 2**). Over half of the infants (67) carried both a rectal and nasal  
242 strain in the same month at some point over the course of the year. The nasal  
243 and rectal strains were genetically identical in 85% (57/67) of the screens in  
244 which *S. aureus* was isolated from both sites.

245 Of the 22 children that acquired *S. aureus* in the nose or rectum in the first days  
246 of life for whom strain data was available, 15 (68.2%) acquired the maternal  
247 strain (**Table 3**). On the 1<sup>st</sup> month visit, 61.8% (n= 76) of infants were *S. aureus*  
248 carriers, 52 (72.2%) of them carried the maternal strain at this point.

249 None of the isolates carried by the mothers during the whole follow up period  
250 were methicillin resistant (MRSA). Two infants acquired non-maternal MRSA  
251 strains surrounding birth, during their stay in the hospital, but both replaced  
252 their strains in the next month, one with the maternal strain, and one with a  
253 different, unrelated strain.

254 Four patterns of carriage could be identified in the infants; (1) Persistent carriers  
255 (n=17, 13%), those who carried *S. aureus* at least 66% of screenings, but also at  
256 least 50% of the screenings in the 2<sup>nd</sup> half of the year, (2) Never carriers, infants  
257 who did not acquire *S. aureus* during the whole study period (n= 9, 7%), despite  
258 the mother being a carrier on enrollment. (3) Transient carriers, infants who  
259 carried *S. aureus* for less than 34% of screenings (n= 55, 42%), and (4) a group  
260 of undetermined pattern (n=51, 38%) who did not meet the criteria for any of  
261 the above carriage patterns (**Table 3**).

261 Most persistent carrier infants carried a single strain over the course of the year,  
262 similar to the observation in the mother population. Over 70% (12/17) of these  
263 infants persistently carried the maternal strain (**Figure 4a**), while 5 (29.4%)  
264 carried a strain that was different than the strain isolated from their mother. In  
265 4/5 of these cases, the mother never carried the infant's persistent strain.

266 Of the nine infants who were never carriers, three had a persistent carrier  
267 mother. Three of the mothers of never carriers only carried *S. aureus* in the  
268 vagina and not in the nose at recruitment and birth, and another five mothers  
269 carried *S. aureus* in the nose at recruitment but screened negative for nasal  
270 carriage at birth and/or the first month of follow up.

271 The most common pattern observed among mothers and infants was that in  
272 which the primary maternal strain was carried by both the mother and infant  
273 (n=76, 58%). In 28 cases (21.5%), the infant did not acquire the maternal strain  
274 at any point during the year.

275 No difference was observed between the number of strains carried by the  
276 mother and baby throughout the year. (**Table 3**). Most mother-infant dyads  
277 (85%) shared a strain at least once during the year.

278 Having a persistent mother was more common among persistent carrier infants  
279 (58.8%), compared to transient carrier infants (49.1%) or to never carrier infants  
280 (33.3%). Yet, having a persistent mother was not an independent predictor for  
281 infant carriage persistence, in a univariate analysis (p=0.38).

282

283 *Predictors of S. aureus carriage during the first year of life*

285 The significant independent predictors for carriage in any given month were  
286 age, carriage of *S. aureus* in the previous month as well as maternal carriage in  
287 the previous month (**Table 4**).

288 The major independent predictor for an infant to be a persistent carrier, was  
289 early acquisition of *S. aureus*, before the age of 2 months (**Table 5**).  
290 Furthermore, when assessing the association between the time of first *S. aureus*  
291 acquisition and the duration of carriage, we observed that the time of first  
292 acquisition predicts the duration of the carriage; The earlier the first acquisition,  
293 the longer it was carried ( $r=-0.3$ ,  $p=0.0007$ ) (**Figure 4**). While children who  
294 acquired the first strain during the first 2 months of life carried it on average for  
295 5.68 ( $\pm 2.42$ ) months (ranging from 1-12 months, median: 3), all of the  
296 children that acquired the first strain after the age of 4 months, had very short-  
297 lived carriage (range: 1-4 months, median :1) .

298 BCC attendance was negatively associated with persistent *S. aureus* carriage in  
299 children ( $p=0.03$ ). Sex, gestational age, maternal carriage persistence, birth  
300 weight, breastfeeding, pets, antibiotic use in the first year of life, breastfeeding,  
301 and skin infections were included in the univariate analysis but were not found  
302 to be significant and were not included in the multivariate analysis.

303

304

### 305 Discussion

306 In this study, we followed maternal and infant *S. aureus* carriage throughout the  
307 first year of life. We found that most infants (93%) acquired *S. aureus* sometime

308 during the first year, yet, most did not acquire *S. aureus* during birth, but  
309 acquired the maternal strain within the first month of life. Furthermore, we  
310 found that early acquisition of a *S. aureus* strain is the most significant predictor  
311 of long and persistent *S. aureus* carriage in the first year of life. These results  
312 point to the significant impact of maternal *S. aureus* carriage in the first months  
313 of a child life, on the infant's carriage dynamics.

314 We show that over half of the mothers who were detected as carriers around  
315 labor, persistently carried *S. aureus*, mostly with single strain throughout the  
316 year. A quarter of the mothers were defined as transient carriers, of which most  
317 carried *S. aureus* in only one or two carriage events. In line with previous  
318 studies, we observed strain persistence in our healthy adult population, (12, 17).  
319 MRSA was not isolated from any mother at any point throughout the year. This  
320 is consistent with data from Israel, where community-acquired MRSA is not  
321 common (18).

322 In contrast to the extensive data on adult *S. aureus* carriage, not much has been  
323 reported on carriage patterns in early infancy. The duration of carriage, patterns  
324 and dynamics of carriage, or the predictors of carriage during infancy have been  
325 studied, but most studies did not continue past 6 months of age (19, 20) and  
326 those that followed the infants and mothers for an entire year only looked at 2-3  
327 swabs during the course of the year (6, 21). Here, we screened the mothers and  
328 infants monthly, to obtain a full picture of their carriage patterns, as well as  
329 predictors of infant carriage in each month.

330 We previously reported that infants born to carrier mothers in the same cohort  
331 acquired their maternal strain in the first month of life (22). Here, we look at the

331ull year and find that throughout the course of the year, 85% of infants acquired  
332the maternal strain at least once, and that 12 of 17 persistent infants carried the  
333maternal strain persistently. In line with observations by Jimenez-Truque et al,  
334we observed that maternal carriage was a predictor of infant carriage at any  
335given month, but, surprisingly, we did not find maternal persistence to be an  
336independent predictor of infant persistence. Rather, it appeared that persistent  
337carrier infants were likely to acquire their maternal strain early, within the first  
3381-2 months of life and that this early acquisition was the most significant  
339predictor of persistent carriage, typically of a single strain, i.e. the maternal  
340strain. Perhaps, in a larger sample size, maternal persistence would be a more  
341significant predictor of persistent infant carriage. However, we did find that  
34233% of never-carrier infants were born to persistent mothers, this is low  
343compared to persistent carrier infants, of whom 70% had a persistent carrier  
344mother. Additionally, we and others have previously found that infants carried  
345by both parents were infected by strains carried by both parents (18, 23, 24), and it is likely  
346that looking at parental carriage patterns, as opposed to only maternal, would  
347provide more evidence of an association between parent and infant persistence.  
348The sites of *S. aureus* carriage in early infancy have not been thoroughly studied  
349previously. Here, we screened infants for both rectal and nasal carriage and  
350observed that while prevalence of rectal and nasal carriage were almost equal  
351surrounding birth, nasal carriage became the dominant site of carriage. We also  
352observed that rectal and nasal strains were identical 85% of the time. In line  
353with this, Lindberg et al (24) observed that strains isolated from rectal samples  
354in the first 2 months of life were parental skin strains.

356 The role of the pathogen in determining the carriage pattern has been previously  
357 studied. No association between specific clones and carriage pattern was found  
358 by Muthukrishnan et al (13). Similarly, we did not find any correlation between  
359 specific strains (as determined by spa type) and carriage pattern in our  
360 population. Furthermore, we assessed whether among individuals that carried a  
361 secondary strain, the duration of carriage of the secondary strain would depend  
362 on the genetic relatedness to the primary strain, but did not find any statistically  
363 significant relation.

364 Previous findings by our group show that *S. aureus* carriers display a  
365 tolerogenic immune response to their own strain (25) and it is known that host-  
366 bacterial interactions in early life help shape the developing immune system and  
367 the commensal microbiome for years to come. These results, where we show  
368 that early acquisition of a strain predicts longer carriage during the first year of  
369 life, are consistent with the idea of a tolerogenic response to early acquisition of  
370 *S. aureus*, though long-term follow-up into late childhood or even adulthood are  
371 required to determine the implication of early *S. aureus* acquisition .

372

373 Our study has several limitations. Although this study was large and  
374 comprehensive, a larger population, possibly including follow up with non-  
375 carriers, or longer follow up time could provide greater statistical power to some  
376 predictors and correlations. Screening of other family members could also  
377 provide more insight and a more comprehensive picture of the dynamics of *S.*  
378 *aureus* carriage within the family and not only between the mother and baby.



37A Additionally, our results on genetic identity depend solely on the evolution of  
38the spa gene.

38A As *S. aureus* carriage plays such a significant role in the dynamics of infection,  
38U understanding the initial acquisition is vital. This study is the first to show such  
38P prominent role of early strain acquisition in both the carriage duration and  
38P pattern, as well as the intimate dynamics of *S. aureus* carriage between mothers  
38S and babies.

386

### 38A Acknowledgments:

38W We would like to thank Dr. Eyal Leshem who was involved in the early stages  
38O of the project. Yael Beker-Ilany who was devoted to the women and the  
39O children and carried out the monthly visits along most of the study years. We  
39W would like to thank the helpful Sheba Medical Center monitoring unit team and  
39O the nursery team.

39T This study was funded by the Chief Scientist, Ministry of Health, Israel (Grant  
39A 1-00000-5622) and the Israel Science Foundation (1590/09, 1658/15).

395

396

397

### 39R References

399. von Eiff C, Becker K, Machka K, Stammer H, Peters G. Nasal carriage as a source of *Staphylococcus aureus* bacteremia. N Engl J Med. 2001;344(1):11-6.
402. Kluytmans JAJW, Wertheim HFL. Nasal carriage of *Staphylococcus aureus* and prevention of nosocomial infections. Infection. 2005;33(1):3-8.
403. Williams R. Healthy carriage of *Staphylococcus aureus*: its prevalence and importance. Bacteriol Rev. 1963;27(1):56.
406. Bogaert D, van Belkum A, Sluijter M, Luijendijk A, de Groot R, Rümke HC, Verbrugh HA, Hermans PW. Colonisation by *Streptococcus pneumoniae* and *Staphylococcus aureus* in healthy children. The Lancet. 2004;363(9424):1871-2.
415. Zanger P, Nurjadi D, Gaile M, Gabrysch S, Kremsner PG. Hormonal contraceptive use and persistent *Staphylococcus aureus* nasal carriage. Clin Infect Dis. 2012;55(12):1625-32.
416. Lebon A, Labout JA, Verbrugh HA, Jaddoe VW, Hofman A, van Wamel W, Moll HA, van Belkum A. Dynamics and determinants of *Staphylococcus aureus* carriage in infancy: the Generation R Study. J Clin Microbiol. 2008;46(10):3517-21.
417. Jacoby, P., Carville, K.S., Hall, G., Riley, T.V., Bowman, J., Leach, A.J., Lehmann, D. and Kalgoorlie Otitis Media Research Project Team. Crowding and other strong predictors of upper respiratory tract carriage of otitis media-related bacteria in Australian Aboriginal and non-Aboriginal children. Pediatr Infect Dis J. 2011;30(6):480-5.

428. Olsen K, Sangvik M, Simonsen GS, Sollid JU, Sundsfjord A, Thune I,  
429 Burberg AS. Prevalence and population structure of *Staphylococcus aureus*  
430 nasal carriage in healthcare workers in a general population. The Tromsø Staph  
431 and Skin Study. *Epidemiol Infect.* 2013;141(1):143-52.
432. Kluytmans J, van Belkum A, Verbrugh H. Nasal carriage of  
433 *Staphylococcus aureus*: epidemiology, underlying mechanisms, and associated  
434 risks. *Clin Microbiol Rev.* 1997;10(3):505-20.
435. Geoghegan JA, Irvine AD, Foster TJ. *Staphylococcus aureus* and  
436 atopic dermatitis: a complex and evolving relationship. *Trends Microbiol.*  
437 2018;26(6):484-97.
438. Sakwinska O, Blanc DS, Lazor-Blanchet C, Moreillon M, Giddey M,  
439 Moreillon P. Ecological temporal stability of *Staphylococcus aureus* nasal  
440 carriage. *J Clin Microbiol.* 2010 August 1, 2010;48(8):2724-8.
441. VandenBergh MFQ, Yzerman EPF, van Belkum A, Boelens HAM,  
442 Bijmons M, Verbrugh HA. Follow-up of *Staphylococcus aureus* nasal carriage  
443 after 8 years: redefining the persistent carrier state. *J Clin Microbiol.* 1999  
444 October 1, 1999;37(10):3133-40.
445. Muthukrishnan G, Lamers RP, Ellis A, Paramanandam V, Persaud AB,  
446 Tafur S, Parkinson CL, Cole AM. Longitudinal genetic analyses of  
447 *Staphylococcus aureus* nasal carriage dynamics in a diverse population. *BMC*  
448 *Infect Dis.* 2013;13(1):221.
449. Murchan S, Kaufmann ME, Deplano A, de Ryck R, Struelens M, Zinn  
450 CE, Füssing V, Salmenlinna S, Vuopio-Varkila J, El Solh N, Cuny C.  
451 Harmonization of pulsed-field gel electrophoresis protocols for epidemiological

- 446 Typing of strains of methicillin-resistant *Staphylococcus aureus*: a single  
447 approach developed by consensus in 10 European laboratories and its  
448 application for tracing the spread of related strains. J Clin Microbiol. 2003.  
449 Apr;41(4):1574-85.
4505. Tenover FC, Arbeit RD, Goering RV, Mickelsen PA, Murray BE,  
451 Persing DH, Swaminathan B. Interpreting chromosomal DNA restriction  
452 patterns produced by pulsed-field gel electrophoresis: criteria for bacterial strain  
453 typing. J Clin Microbiol. 1995 Sep;33(9):2233-9.
4546. H Harmsen D, Claus H, Witte W, Rothgänger J, Claus H, Turnwald D,  
455 Vogel U. Typing of methicillin-resistant *Staphylococcus aureus* in a university  
456 hospital setting by using novel software for spa repeat determination and  
457 database management. J Clin Microbiol. 2003;41(12):5442-8.
4587. Chen C-J, Wang S-C, Chang H-Y, Hung Y-C. Longitudinal analysis of  
459 methicillin-resistant and methicillin-susceptible *Staphylococcus aureus* carriage  
460 in healthy adolescents. J Clin Microbiol. 2013 May 15, 2013.
4618. Regev-Yochay G, Raz M, Carmeli Y, Shainberg B, Navon-Venezia S,  
462 Pinco E, Leavitt A, Keller N, Rahav G, Malley R, Rubinstein E. Parental  
463 *Staphylococcus aureus* carriage is associated with staphylococcal carriage in  
464 young children. The Pediatr Infect Dis J. 2009;28(11):960-5.
4659. Jimenez-Truque N, Tedeschi S, Saye EJ, McKenna BD, Langdon W,  
466 Wright JP, Alsentzer A, Arnold S, Saville BR, Wang W, Thomsen I  
467 Relationship between maternal and neonatal *Staphylococcus aureus*  
468 colonization. Pediatrics. 2012;129(5):e1252-e9.

4690. Peacock SJ, Justice A, Griffiths D, De Silva GD, Kantzanou MN,  
470 Crook D, Sleeman K, Day NP. Determinants of acquisition and carriage of  
471 *Staphylococcus aureus* in infancy. J Clin Microbiol. 2003;41(12):5718-25.
4721. Schaumburg F, Alabi AS, Mombo-Ngoma G, Kaba H, Zoleko RM,  
473 Biop DA, Mackanga JR, Basra A, Gonzalez R, Menendez C, Grobusch MP.  
474 Transmission of *Staphylococcus aureus* between mothers and infants in an  
475 African setting. Clin Microbiol Infect. 2014;20(6):O390-O6.
4762. Maayan-Metzger A, Strauss T, Rubin C, Jaber H, Dulitzky M, Reiss-  
477 Mandel A, Leshem E, Rahav G, Regev-Yochay G. Clinical evaluation of early  
478 acquisition of *Staphylococcus aureus* carriage by newborns. Int J Infect Dis.  
479 2017;64:9-14.
4803. Le Thomas, I., Mariani-Kurkdjian, P., Collignon, A., Gravet, A.,  
481 Clermont, O., Brahimi, N., Gaudelus, J., Aujard, Y., Navarro, J., Beaufils, F.  
482 and Bingen, E. Breast milk transmission of a Panton-Valentine leukocidin-  
483 producing *Staphylococcus aureus* strain causing infantile pneumonia. J Clin  
484 Microbiol. 2001;39(2):728-9.
4854. Lindberg, Erika, Ingegerd Adlerberth, Bill Hesselmar, Robert Saalman,  
486 Inga-Lisa Strannegård, Nils Åberg, and Agnes E. Wold. High rate of transfer of  
487 *Staphylococcus aureus* from parental skin to infant gut flora. J Clin Microbiol.  
488 2004;42(2):530-4.
4895. Reiss-Mandel A, Rubin C, Zayoud M, Rahav G, Regev-Yochay G. S.  
490 *Staphylococcus aureus* colonization induces strain-specific suppression of IL-17. Infect Immun  
491 2018 Jan 8:IAI-00834.
- 492

493

#### 494 Captions to Figures and Tables:

495 Table 1. Study Population Characteristics

496 Table 2. Most commonly carried strains

497 Table 3. Maternal and infant carriage patterns and dynamics

498 Table 4: Independent predictors of child *S. aureus* carriage in each month

499 Table 5. Independent predictors of persistent *S. aureus* carriage in infants

500

501 Figure 1. Patterns of carriage among mothers. (a) Carriage patterns of persistent  
502 carrier mothers (n=70), (b) carriage patterns of transient carrier mothers (n=32).  
503 Green strain indicates the main strain carried by the mother. Blue indicates the  
504 secondary strain carried by the mother. Yellow and red indicate third and fourth  
505 strains carried, when applicable. Grey indicates a missed screen or unidentified  
506 strain.

507 Figure 2. Infant nasal and rectal *S. aureus* carriage by month. Bars represent the  
508 percentage of all screened children who carried *S. aureus* nasally (black),  
509 rectally (dark grey) and both rectally and nasally (light grey) in a given month.

510 Figure 3. Infant carriage patterns (a) Carriage patterns of persistent carrier  
511 infants (n=17), (b) carriage patterns of transient carrier infants (n=52). Green  
512 strain indicates the main strain carried by the infant's mother. Blue indicates the  
513 secondary strain, acquired by the child from a different source (c,d). Yellow and

514ed indicate third and fourth strains carried, when applicable. Grey indicates a  
515missed screen.

516Figure 4. First acquisition of carriage vs duration of initial carriage. Circle size  
517indicates amount of infants whose acquisition vs duration intersect at that point.

518

519

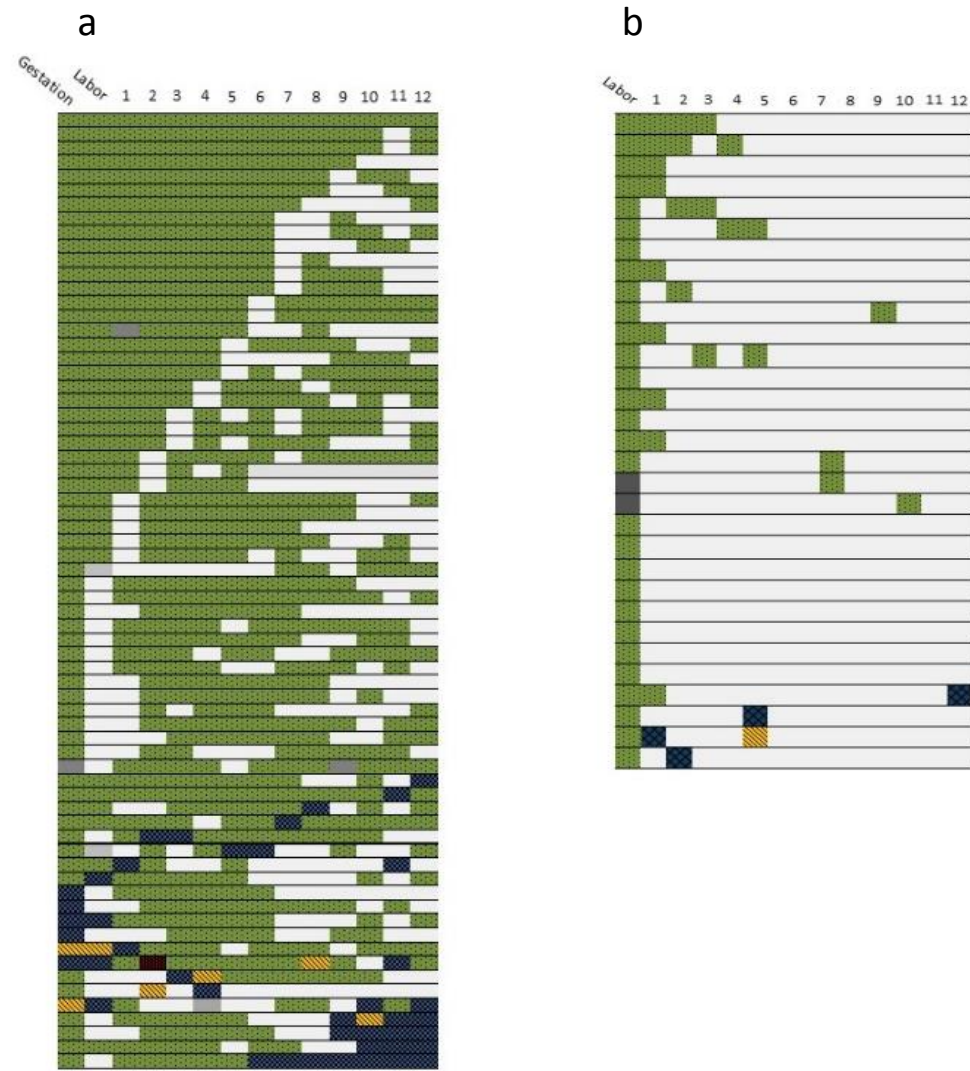

Figure 1. Patterns of carriage among mothers. (a) Carriage patterns of persistent carrier mothers (n=70), (b) carriage patterns of transient carrier mothers (n=32). Green strain indicates the main strain carried by the mother. Blue indicates the secondary strain carried by the mother. Yellow and red indicate third and fourth strains carried, when applicable. Grey indicates a missed screen or unidentified strain.



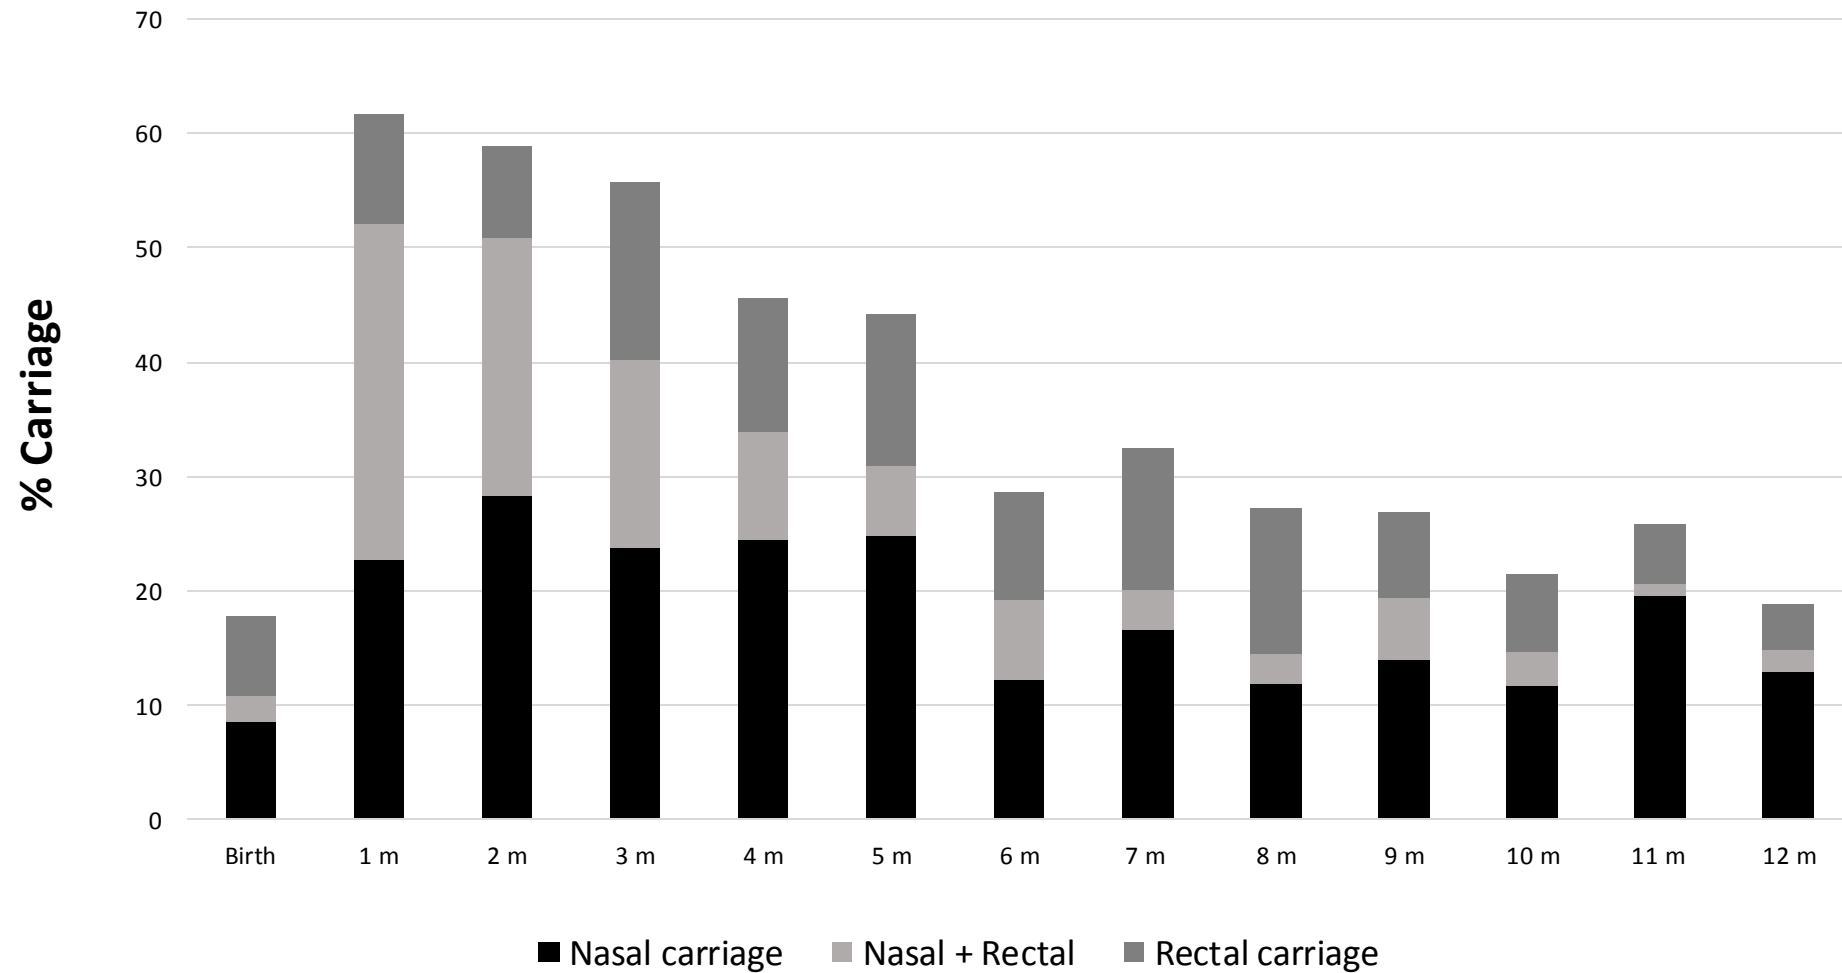

Figure 2. Infant nasal and rectal *S. aureus* carriage by month. Bars represent the percentage of all screened children who carried *S. aureus* nasally (black), rectally (dark grey) and both rectally and nasally (light grey) in a given month

**a**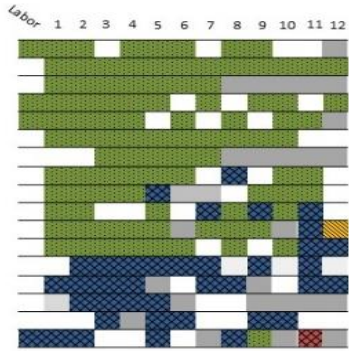**b**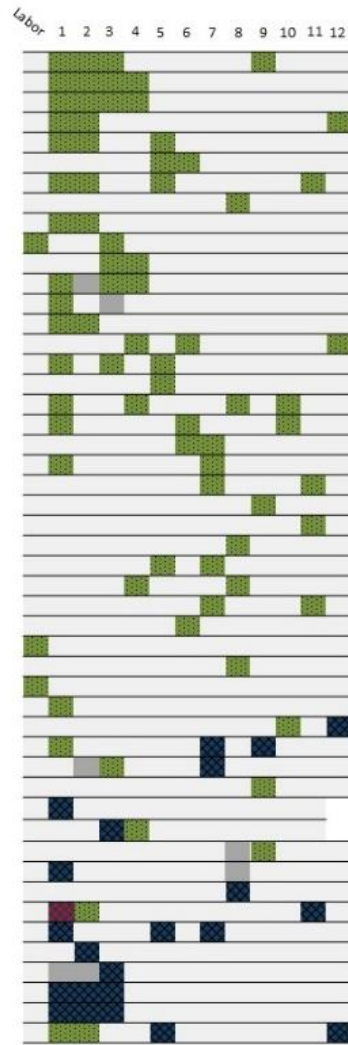

Figure 3. Infant carriage patterns (a) Carriage patterns of persistent carrier infants (n=17), (b) carriage patterns of transient carrier infants (n=52). Green strain indicates the main strain carried by the infant's mother. Blue indicates the secondary strain, acquired by the child from a different source (c,d). Yellow and red indicate third and fourth strains carried, when applicable. Grey indicates a missed screen.

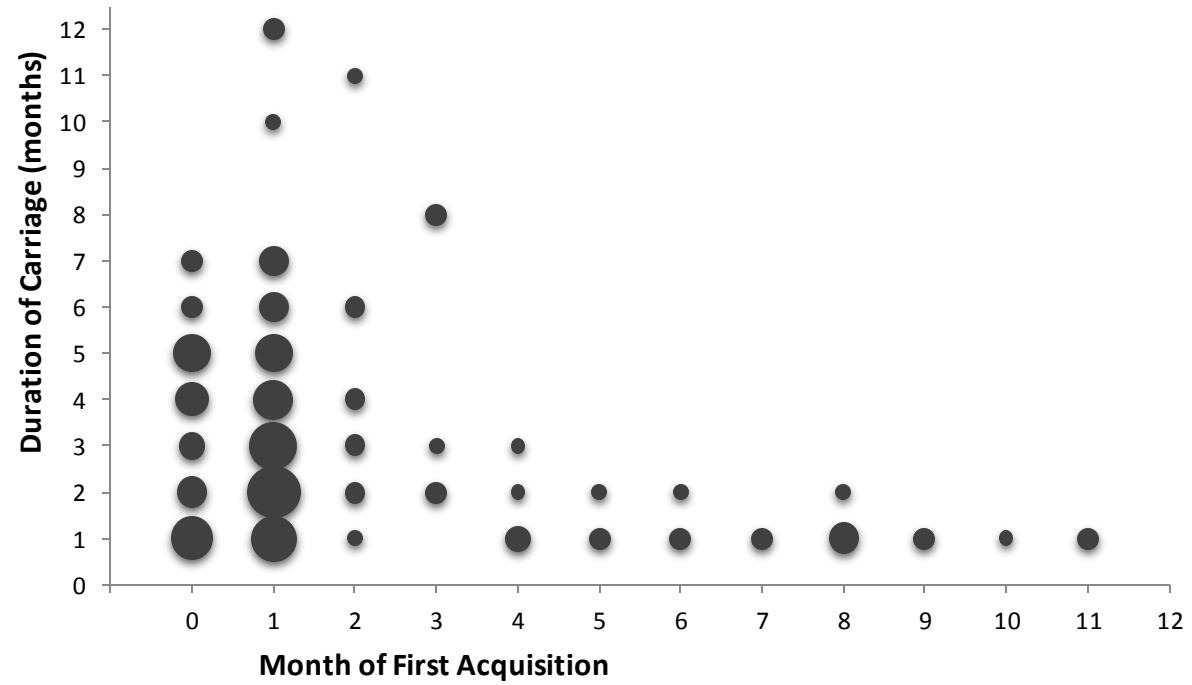

Figure 4. First acquisition of carriage vs duration of initial carriage. Circle size indicates amount of infants whose acquisition vs duration intersect at that point.

| Variable               | No.   | %      | Range         | Mean                |
|------------------------|-------|--------|---------------|---------------------|
| <b>Mother</b>          | n=130 |        |               |                     |
| Age (years)            |       |        | 21 to 43      | 34.24 (+/- 4.71)    |
| Education (years)      |       |        | 12 to 20      | 16.20 (+/- 2.20)    |
| Cesarean Section Birth | 33    | 26.83% |               |                     |
| <b>Child</b>           | n=132 |        |               |                     |
| Gestational age        |       |        | 34.57 - 42.14 | 39.93 (+/-1.48)     |
| Birth weight (g)       |       |        | 2030-4396     | 3310.41 (+/-496.12) |
| DCC attendance         | 74    | 56.06% |               |                     |
| (age at entry, months) |       |        | 3-12          | 7.1 (+/ 2.44)       |
| Breastfeeding          | 119   |        |               |                     |
| (duration, months)     |       |        |               |                     |
| > 1 m                  | 114   | 86.36% |               |                     |
| > 3 m                  | 104   | 78.79% |               |                     |
| > 6 m                  | 75    | 56.82% |               |                     |
| Antimicrobial use      | 72    |        |               |                     |
| months with use        |       |        |               | 1.81 (+/ 1.25)      |
| Physician visits       |       |        |               |                     |
| Ever during the year   | 126   | 95.45% |               |                     |
| Visited >2 times       | 100   | 75.76% |               |                     |
| Visited >3 times       | 78    | 59.09% |               |                     |
| Visited >5 times       | 45    | 34.09% |               |                     |
| Hospitalizations       | 12    | 9.09%  |               |                     |

Table 1. Study Population Characteristics

| Clonal Complex | No. dyads carrying | Spa Types (no. dyads carrying)                                                                                                                               |
|----------------|--------------------|--------------------------------------------------------------------------------------------------------------------------------------------------------------|
| CC30           | 27 (20.5%)         | t012 (9), t018 (5), t021 (5), t233 (2), singletons (5)                                                                                                       |
| CC22           | 19 (14.3%)         | t3243 (10), t223 (5), t005 (2), singletons (2)                                                                                                               |
| CC398          | 14 (10.6%)         | t6605 (5), t1149 (4), t937 (3), t571 (2)                                                                                                                     |
| CC45           | 13 (9.8%)          | t630 (4), singletons (8)                                                                                                                                     |
| CC8            | 12 (9.1%)          | t701(5), t008 (3), singletons (4)                                                                                                                            |
| CC1            | 11 (8.3%)          | t189 (5), t127 (4), singletons (2)                                                                                                                           |
| CC5            | 7 (5.3%)           | t002 (3), t111 (2), singletons (2)                                                                                                                           |
| CC15           | 4 (3%)             | t084 (3), t228 (1)                                                                                                                                           |
| CC9            | 4 (3%)             | t209 (3), t099 (1)                                                                                                                                           |
| CC72           | 4 (3%)             | t148 (4)                                                                                                                                                     |
| CC7            | 4 (3%)             | t091 (2), singletons (2)                                                                                                                                     |
| CC20           | 3 (2.2%)           | t164 (2), t731 (1)                                                                                                                                           |
| Other          |                    | t12793 (2), t1445 (4), t1451 (2), t1458 (3), t14581 (2), t2325 (3), t267 (3), t3454 (10), t377 (2), t493 (3), t7234 (2), t364 (2), t773 (5), singletons (74) |

Table 2. Most commonly carried strains

| Variable                                     | No.    | %     | Range | Mean            |
|----------------------------------------------|--------|-------|-------|-----------------|
| <b>Mother</b>                                |        |       |       |                 |
| Carriage Site at Recruitment                 |        |       |       |                 |
| Vaginal Only                                 | 28     | 21.54 |       |                 |
| Nasal Only                                   | 80     | 61.54 |       |                 |
| Nasal and Vaginal                            | 22     | 16.92 |       |                 |
| Carriage Persistence                         |        |       |       |                 |
| Transient                                    | 32     | 24.62 |       |                 |
| Undetermined                                 | 28     | 21.54 |       |                 |
| Persistent                                   | 70     | 53.85 |       |                 |
| No. Strains Carried in Year<br>(vagina+nose) |        |       | 1-4   | 1.42 (+/- 0.69) |
| <b>Child</b>                                 |        |       |       |                 |
| Nasal/Rectal Carriage                        |        |       |       |                 |
| First 72 hours of life                       | 23     | 23.26 |       |                 |
| First Month                                  | 85     | 64.39 |       |                 |
| First Year                                   | 123    | 93.18 |       |                 |
| Maternal Strain Carriage                     |        |       |       |                 |
| First 72 hours of life                       | 15/22  | 68.18 |       |                 |
| First Month                                  | 52/79  | 65.82 |       |                 |
| During First Year                            | 79/123 | 64.23 |       |                 |
| Persistent Carriage                          | 17     | 12.88 |       |                 |
| No. Strains Carried in Year<br>(rectum+nose) |        |       | 1-4   | 1.44 (+/-0.70)  |

Table 3. Maternal and infant carriage patterns and dynamics

|                                                    | OR     | 95% CI |        | P      |
|----------------------------------------------------|--------|--------|--------|--------|
| Child <i>S. aureus</i> carriage in previous month  | 3.11   | 2.28   | 4.26   | <.0001 |
| Mother <i>S. aureus</i> carriage in previous month | 1.98   | 1.41   | 2.78   | 0.0001 |
| Age (months)                                       | 270.35 | 82.34  | 887.76 | <.0001 |

Table 4: Independent predictors of child *S. aureus* carriage in each month
